# Supplementary material for: Handwritten letters and photo albums linking geoscientists with school classes
Source: Copernicus journal article supplement (doi:10.5194/gc-6-1-2023), 2023-02-14
Supplement: Supplementary file 1 [file gc-6-1-2023-supplement.pdf]

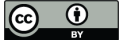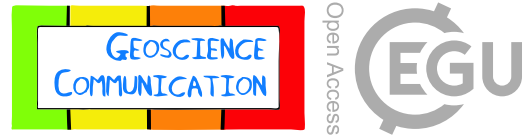

*Supplement of*

## **Handwritten letters and photo albums linking geoscientists with school classes**

**Mathew Stiller-Reeve et al.**

*Correspondence to:* Mathew A. Stiller-Reeve ([mathew@stillerreeve.no](mailto:mathew@stillerreeve.no))

The copyright of individual parts of the supplement might differ from the article licence.

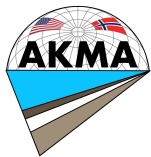

# Evaluation for students

Thank you for taking part in this evaluation survey for the **AKMA Polaroid** project! This survey focuses on the process from when you were introduced to your scientist, you sent your questions to him/her, he/she sent you answers (letter), he/she made you a polaroid photo album, and finally you met either in-person or online. Here's a reminder about the process you should comment on.

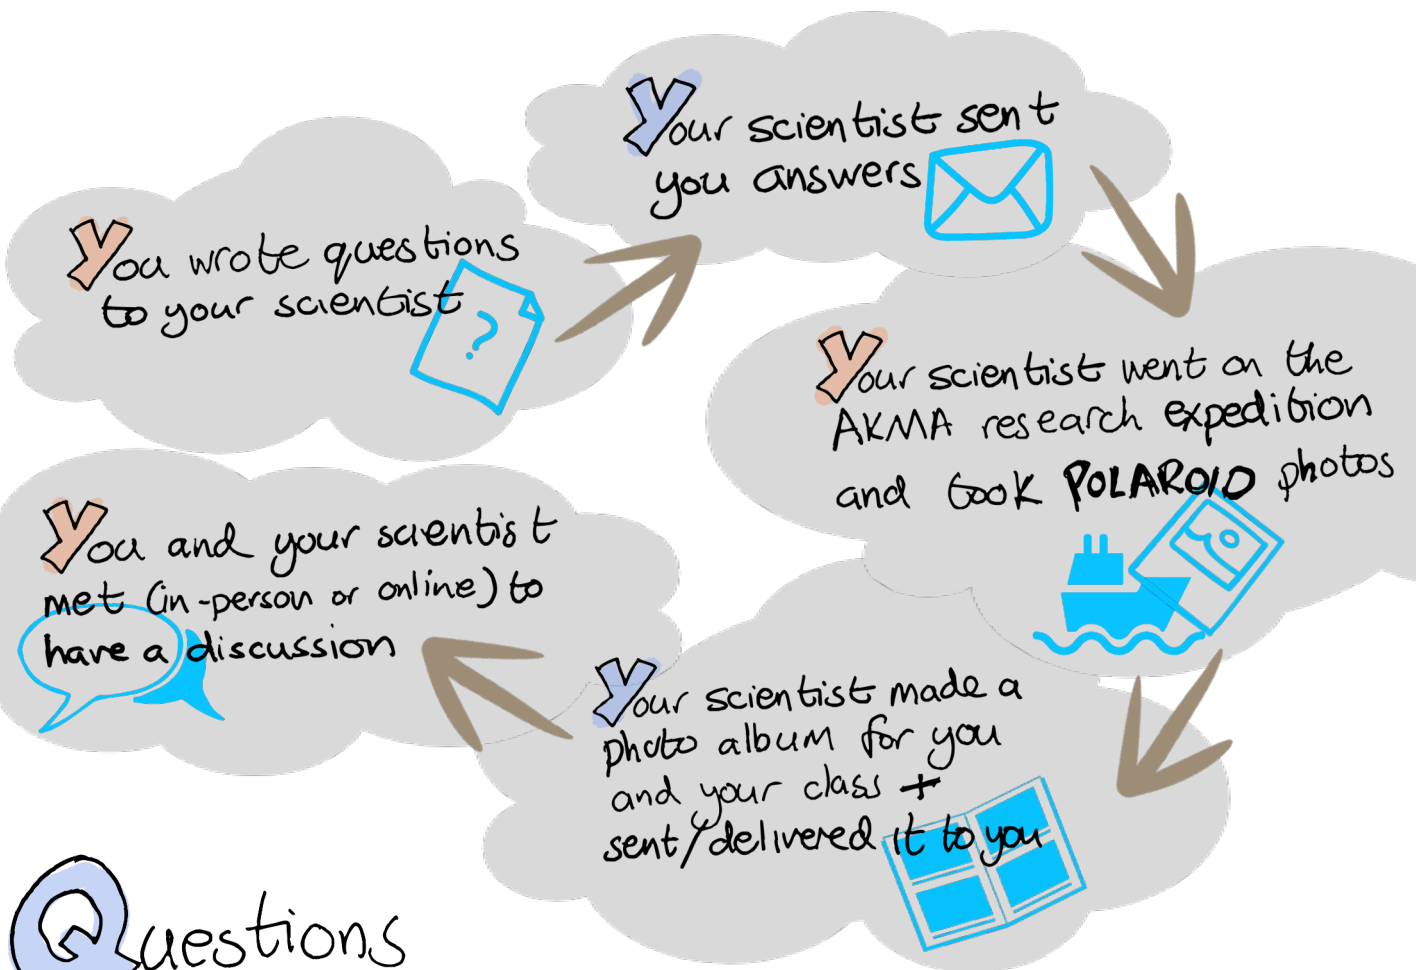

## Questions

Could you please answer the following questions in as much detail as you would like. We would like to hear your honest opinion. Please answer the questions honestly. This questionnaire is **ANONYMOUS**.

1

What did you think about using hand-written letters and polaroid photo albums? Could you write a text about what you feel about the communication with "your" scientist.

2

If you have not mentioned this already, could you say something about the science you learnt through the interaction with the letter and photo albums with the scientists?

3

If you have not mentioned this already, could you say something about if this project has made you think differently about scientists in general?
